# Supplementary material for: Construction of S-scheme heterojunctions of a Ti-doped Ce-MOF and BiOCl for efficient photocatalytic selective oxidation of amines
Source: Royal Society of Chemistry journal article supplement (doi:10.1039/d3qi02645k), 2024-01-01
Supplement: d3qi02645k1.pdf [file d3qi02645k1.pdf]

## Supporting Information (SI)

### Construction of S-scheme heterojunctions of Ti doped Ce-MOF and BiOCl for efficient photocatalytic selective oxidation of amines

Danxia Zhao,<sup>\*a,b</sup> Pengyu Wu<sup>c</sup>, Huayue Zhu<sup>a,b</sup>, Ru jiang<sup>a,b</sup>, Jingwei Chen<sup>a</sup>, Chuhan Qiu<sup>a</sup>, Shengtao Jiang<sup>a</sup> and Guoping Lu<sup>d\*</sup>

*<sup>a</sup> Institute of Environmental Engineering Technology, Taizhou University, Taizhou 318000, Zhejiang, P. R. China \*.*

*<sup>b</sup> Zhejiang Provincial Key Laboratory of Plant Evolutionary Ecology and Conservation, Taizhou University, Taizhou, Zhejiang 318000, P. R. China \*. E-mail: danxia@tzc.edu.cn; danxia@126.com.*

*<sup>c</sup> Key Laboratory for Advanced Technology in Environmental Protection of Jiangsu Province, Yancheng Institute of Technology, Jiangsu 224051, P. R. China.*

*<sup>d</sup> Nanjing University of Science and Technology, School of Chemical Engineering, 200 Xiaoling Wei, Nanjing, Jiangsu 210094, P. R. China. E-mail: [glu@njust.edu.cn](mailto:glu@njust.edu.cn).*

|                                                                                         |            |
|-----------------------------------------------------------------------------------------|------------|
| <b>Preparation of UiO-66(Ce/Ti).....</b>                                                | <b>S1</b>  |
| <b>Preparation of BiOCl/UiO-66(Ce/Ti) (BCT) .....</b>                                   | <b>S1</b>  |
| <b>Characterization of photocatalysts.....</b>                                          | <b>S1</b>  |
| <b>Electrochemical measurements.....</b>                                                | <b>S2</b>  |
| <b>EPR measurements.....</b>                                                            | <b>S2</b>  |
| <b>Computational methodologies and models.....</b>                                      | <b>S2</b>  |
| <b>Fig. S1 XRD patterns and Fourier transform infrared spectra.....</b>                 | <b>S4</b>  |
| <b>Fig. S2 SEM images and XRD before and after the photocatalytic reaction.....</b>     | <b>S4</b>  |
| <b>Fig. S3 UV-vis diffuse reflectance spectra. ....</b>                                 | <b>S5</b>  |
| <b>Fig. S4 XPS-VB spectra of the samples. ....</b>                                      | <b>S5</b>  |
| <b>Fig. S5 Mott-Schottky plots of pure BiOCl and UiO-66(Ce/Ti). ....</b>                | <b>S6</b>  |
| <b>Fig. S6 Total density of states and local density of states of the samples. ....</b> | <b>S6</b>  |
| <b>Fig. S7 XPS spectra.....</b>                                                         | <b>S7</b>  |
| <b>Fig. S8 EPR spectra.....</b>                                                         | <b>S7</b>  |
| <b>Fig. S9 H<sub>2</sub>O<sub>2</sub> validation experiment.....</b>                    | <b>S8</b>  |
| <b>Table S1. Comparison of the photocatalytic activity .....</b>                        | <b>S9</b>  |
| <b>References.....</b>                                                                  | <b>S11</b> |

## Experimental

### Preparation of UiO-66(Ce/Ti)

The bimetallic UiO-66(Ce/Ti) was prepared by incorporating Ti into UiO-66(Ce) via facile cation exchange. The  $\text{TiCp}_2\text{Cl}_2$  (97.5 mg) and the UiO-66(Ce) crystals (130 mg) were mixed in 25 mL DMF with vigorous stirring. The obtained homogeneous liquid was transferred to a 50 mL round-bottom flask, and kept at 100 °C for 3 h and then cooled down to the room temperature. The product UiO-66(Ce/Ti) was collected by centrifugation and washed three times with DMF and ethanol respectively. The resultant UiO-66(Ce/Ti) crystals were collected and dried under vacuum at 80 °C before use.

### Preparation of BiOCl/UiO-66(Ce/Ti) (BCT)

In a typical procedure, 200 mg UiO-66(Ce/Ti) and 5 mmol  $\text{KMnO}_4$  were each dissolved in 20 ml of de-ionized water, and the former was ultrasonically dispersed for 30 min to form a homogeneous suspension (denoted as solution A). 5 mmol  $\text{BiCl}_3$  was dissolved in 30 ml ethylene glycol to form a homogeneous solution B. Subsequently, the prepared A and B solution was added dropwise to the  $\text{KMnO}_4$  solution under continuous stirring. After 2 h, the obtained mixture was moved to a 100 mL Teflon-lined stainless steel autoclave and heated at 160 °C for 6 h and a brown powder product was obtained. Finally, the resultant BiOCl/UiO-66(Ce/Ti) compound (named as BCT) was centrifuged and washed with de-ionized water and ethanol several times before being dried at 70 °C for 12 h. For comparison, the pure BiOCl was prepared according to the same procedure except for the precursor without UiO-66(Ce/Ti) crystals.

## Experimental Methods

### Characterization of photocatalysts

X-ray diffractometry (XRD) using a Shimadzu XRD-6000 diffractometer with  $\text{Cu K}\alpha$  irradiation. Fourier transform infrared (FTIR) spectroscopy was performed at 8  $\text{cm}^{-1}$  resolution in the range of 400-4000  $\text{cm}^{-1}$  on a Nicolet iS10 FTIR spectrometer. Scanning electron microscopy (SEM) images was performed using a Hitachi S-4800. TEM images were taken using a PHILIPS Tecnai 12 microscope operating at 120 kv. Energy Dispersive X-ray Spectroscopic analysis (EDS) was performed with a JEM-

2010(HR) transmission electron microscope at an acceleration voltage of 200kV. High Resolution Transmission electron microscopy (HRTEM) was performed on Philips-FEI Tecnai G2 F20 operating at 300kv. In addition, the in situ XPS measurements were carried out on an ESCALAB 250Xi spectrometer (Thermo Scientific, USA) under light irradiation (365-800nm) or dark conditions. All samples were analyzed under a pressure of less than  $1.0 \times 10^{-9}$  Pa. Spectra were acquired through the advantage software (Version 5.979) with a step of 0.05 e V. The UV-Vis diffuse reflectance spectra of the catalysts were recorded on a UV-Vis spectrometer (Lambda 750) within the range of 200 - 1100 nm. Photoluminescence spectra (PL) of the catalysts were carried out on a spectrophotometer (LabRAM HR Evolution).

### **Electrochemical measurements**

Electrochemical and photoelectrochemical measurements were carried out on an electrochemical workstation (CHI 660E, Shanghai) with a standard three-electrode system. The powder coated on indium-tin-oxide (ITO) glass substrate was applied as the working electrode. 10 mg powder was suspended into 1 mL absolute ethanol and then the slurry was dropwise added on a ITO substrate (15 mm  $\times$  30 mm). The working electrode was exposed to air for 10 h to remove the ethanol. Platinum wire and Ag/AgCl electrode were used as the counter electrode and reference electrode, respectively. The electrolyte was 0.1 M Na<sub>2</sub>SO<sub>4</sub> solution and illumination source was a 300 W Xe lamp providing simulated solar light.

### **EPR measurements**

EPR spectra using TEMP as a trapping agent were recorded using a Wilmad WG-810-A quartz flat cell in a mixture of O<sub>2</sub>-substrated H<sub>2</sub>O/MeOH (1:4 v/v) of BCT (4 mg mL<sup>-1</sup>) and TEMP (1.2 M). ESR spectra utilizing DMPO as a trapping agent were recorded using a Wilmad WG-810-A quartz flat cell in a mixture in O<sub>2</sub>-substrated H<sub>2</sub>O/MeOH (1:4 v/v) of BCT (4 mg mL<sup>-1</sup>) and DMPO (1.8 M). ESR analysis was carried out at microwave frequency of 9.21 GHz at 298 K in the dark or under visible light ( $\lambda > 420$  nm).

### **Computational methodologies and models**

First-principle density-functional-theory (DFT) calculations have been performed through the Vienna ab initio simulation package (VASP) code.<sup>1, 2</sup> The electron-ion interactions were treated via the projector augmented wave (PAW)<sup>3</sup> method. The electronic exchange and correlation effects were approximated with

the Perdew-Burke-Ernzerhof (PBE)-type of generalized gradient approximation (GGA).<sup>4</sup> The cut-off energy for plane wave is set to 480 eV. The energy criterion is set to  $10^{-4}$  eV in the iterative solution of the Kohn-Sham equation. To avoid interlaminar interactions, a vacuum spacing of 20 Å is applied perpendicular to the slab. The Brillouin zone integration is performed using a  $2 \times 2 \times 1$  k-mesh. All the structures are relaxed until the residual forces on the atoms have declined to less than 0.05 eV/Å. To improve the accuracy of the electronic properties, the Hubbard U correction<sup>5</sup> for the on-site Coulomb (4 eV for Ti and 5 eV for Ce) is applied. Using pre-optimized bulk lattice parameters and atomic coordinates, the interfacial configuration was constructed by coupling the (001) surface of the UiO-66 with the (001) surface of BiOCl. Data analysis and visualization are carried out with the help of VASPKIT<sup>6</sup> code and VESTA<sup>7</sup>. The adhesive energy  $E_{ads}$  is expressed as

$$E_{ads, BiOCl/MOF - C7H9N} = E_{BiOCl/MOF - C7H9N} - E_{BiOCl/MOF} - E_{C7H9N} \quad (1)$$

$$E_{ads, BiOCl - C7H9N} = E_{BiOCl - C7H9N} - E_{BiOCl} - E_{C7H9N} \quad (2)$$

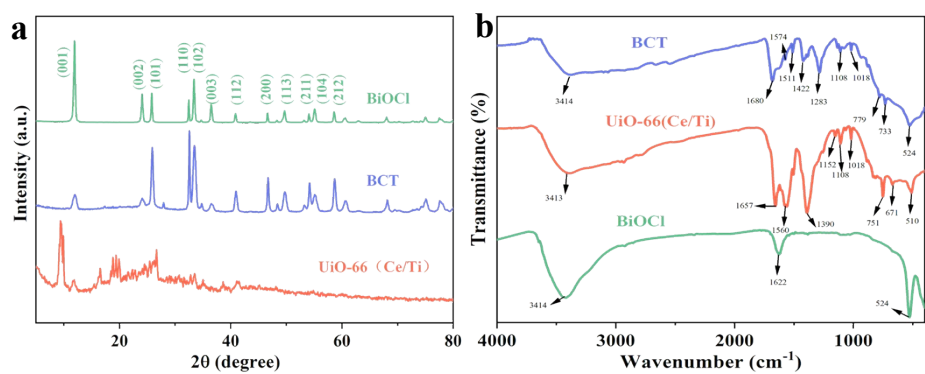

Fig. S1 a) XRD patterns, and b) Fourier transform infrared spectra of BiOCl, UiO-66(Ce/Ti) and BCT.

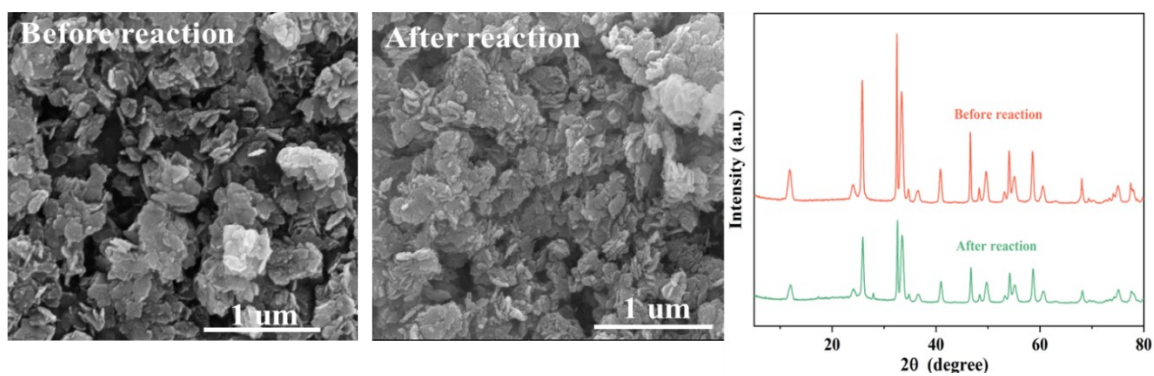

Fig. S2 SEM images and XRD before and after the photocatalytic reaction.

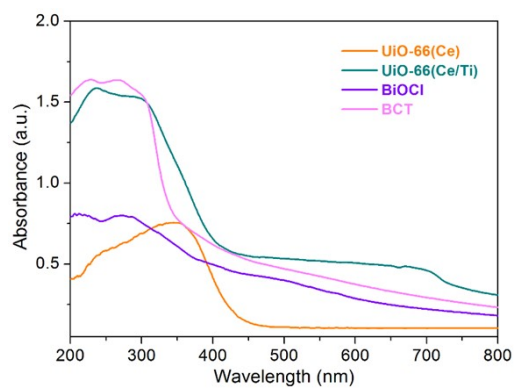

**Fig. S3** UV-vis diffuse reflectance spectra of the obtained materials.

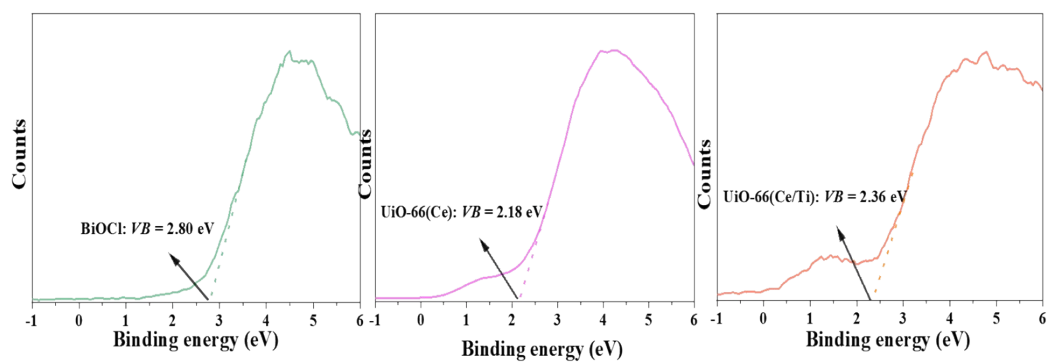

**Fig. S4** XPS-VB spectra of the samples.

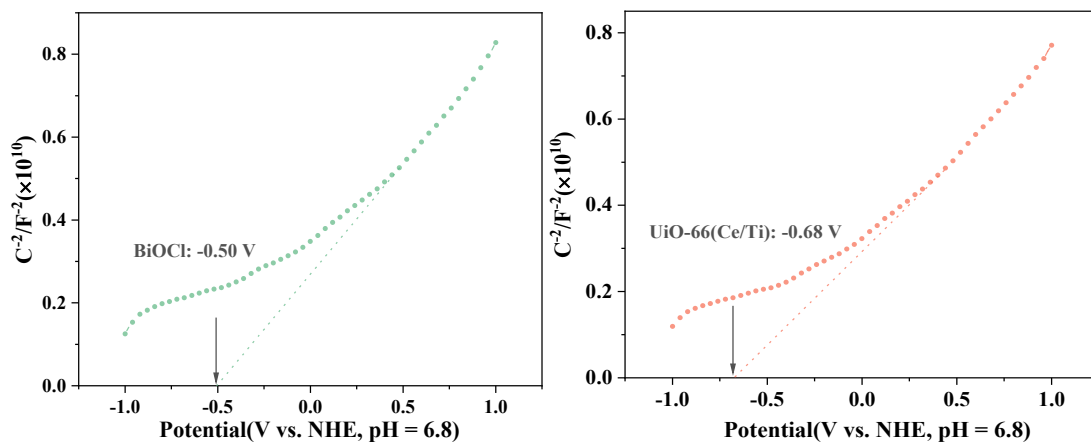

**Fig. S5** Mott-Schottky plots of pure BiOCl and UiO-66(Ce/Ti). Experimental conditions: the sample coated on indium-tin-oxide (ITO) glass substrate was applied as the working electrode, Platinum wire and Ag/AgCl electrode were used as the counter electrode and reference electrode, respectively, and 0.1 M Na<sub>2</sub>SO<sub>4</sub> solution as the electrolyte.

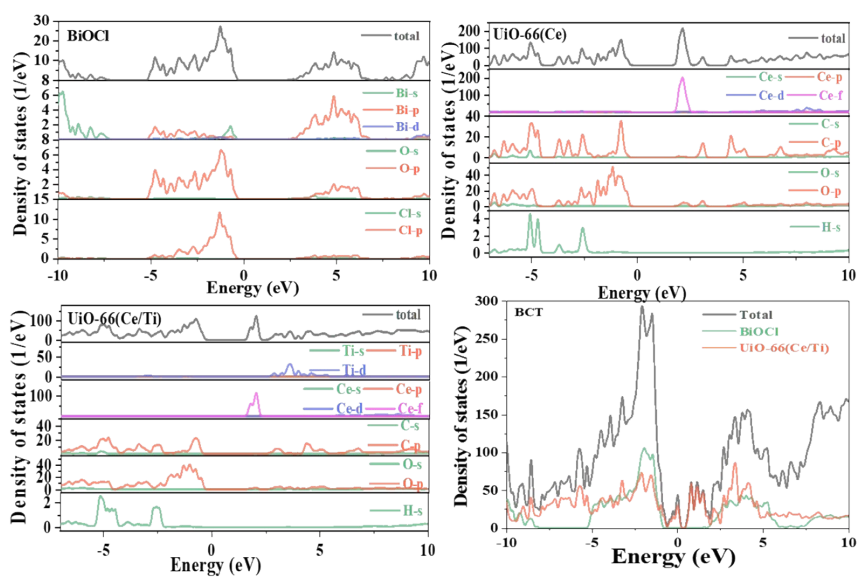

**Fig. S6** Total density of states and local density of states of the samples.



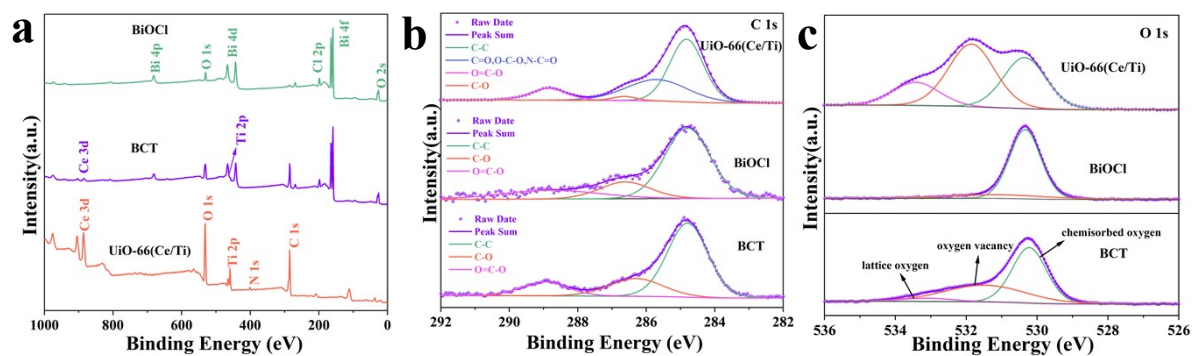

**Fig. S7** (a) Full XPS spectra of the samples. High-resolution XPS spectra of (a) C 1s, (b) O 1s in the samples.

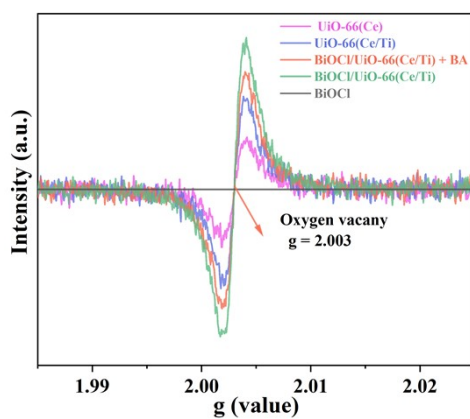

**Fig. S8** EPR spectra of samples without UV-Vis irradiation.

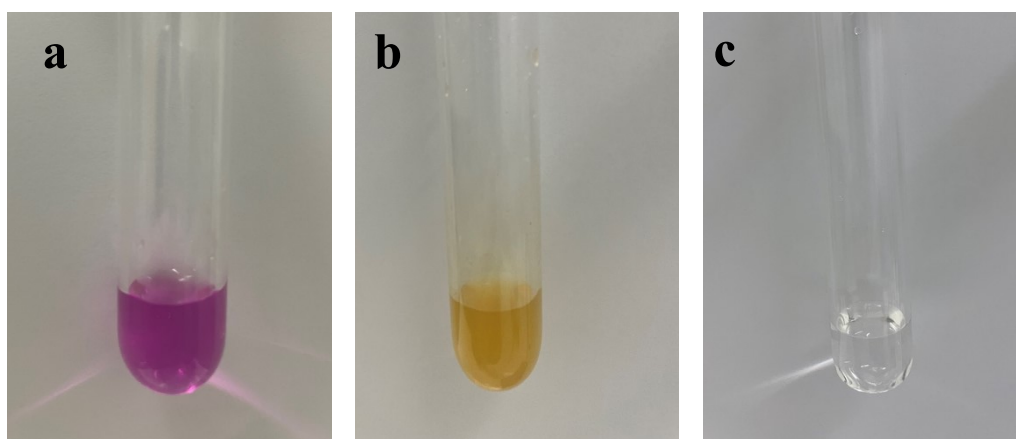

**Fig. S9** (a) The aniline solution after adding  $\text{KMnO}_4$ . (b) Add the aniline solution to the  $\text{KMnO}_4$  with mechanical stirring for 5 min. (c) After filtering the catalyst and light-catalyzed reaction for 30 min, add  $\text{KMnO}_4$  to the aniline solution. Reaction conditions:  $\text{KMnO}_4$  ( $1\mu\text{mol}$ ), benzylamine ( $0.2\text{ mmol}$ ), catalysts ( $20\text{ mg}$ ),  $\text{H}_2\text{O}$  ( $3\text{ mL}$ ),  $\text{O}_2$  atmosphere, visible light ( $\lambda > 400\text{ nm}$ ).

**Table S1.** Comparison of the photocatalytic activity of BiOCl/UiO-66(Ce/Ti) (BCT) composite with different heterogeneous catalysts for the selective oxidation of benzylamine.

| Entry | Catalysts                                                                          | Conditions                                                                                      | Yield [%] |
|-------|------------------------------------------------------------------------------------|-------------------------------------------------------------------------------------------------|-----------|
| 1     | BCT in this work                                                                   | 1 atm O <sub>2</sub> , 3 ml H <sub>2</sub> O, white LEDs ( $\lambda > 400$ nm), 6 h             | 98        |
| 2     | B-BO-1,3,5 <sup>8</sup>                                                            | 1 atm O <sub>2</sub> , 3 ml CH <sub>3</sub> CN, 23 W energy saving fluorescent light bulb, 24 h | 22        |
| 3     | TCP-CP-CMP <sup>9</sup>                                                            | 1 atm O <sub>2</sub> , 10 ml CH <sub>3</sub> CN, 100 W white LED, 48 h                          | 76        |
| 4     | BiOBr-OV <sup>10</sup>                                                             | In air, 1 ml CH <sub>3</sub> CN, Xe lamp (300 W, $> 420$ nm), 12 h                              | 96        |
| 5     | NH <sub>2</sub> -MIL-125(Ti) <sup>11</sup>                                         | In air, 2 ml CH <sub>3</sub> CN, Xe lamp (300 W, $> 420$ nm), 12 h                              | 73        |
| 6     | Tx-CMP <sup>12</sup>                                                               | 1 atm O <sub>2</sub> , 5 ml ACN, Natural sunlight, 4 h                                          | 78        |
| 7     | Au-Pt/Cu <sub>7</sub> S <sub>4</sub> -Cu <sub>9</sub> S <sub>8</sub> <sup>13</sup> | 1 atm O <sub>2</sub> , 4 ml DMF, 300 W xenon lamp, 1.5 h                                        | 99        |
| 8     | ZnTEPP-PBI <sup>14</sup>                                                           | 1 atm O <sub>2</sub> , 24 ml MeCN, white LED (90 mW/cm <sup>2</sup> ), 4 h                      | 99        |
| 9     | WS <sub>2</sub> <sup>15</sup>                                                      | 50°C, 1 atm O <sub>2</sub> , NMP/ACN (10 ml, 3:7), 60 W white LED lamp, 30 h                    | 93        |
| 10    | Cu <sub>2</sub> O/CQD <sup>16</sup>                                                | 1 atm O <sub>2</sub> , 10 ml CAN, 20 W white LED light, 8 h                                     | 95        |
| 11    | ATA-BiOCl <sup>17</sup>                                                            | 1 atm O <sub>2</sub> , 5 ml ACN, 15 W fluorescent lamp, 24 h                                    | 95        |

|    |                             |                                                                               |    |
|----|-----------------------------|-------------------------------------------------------------------------------|----|
| 12 | Au@DUT-67(Zr) <sup>18</sup> | 0.1 MPa O <sub>2</sub> , 1 mL DMF, visible light ( $\lambda \geq 400$ nm), 6h | 68 |
|----|-----------------------------|-------------------------------------------------------------------------------|----|

## References

1. G. Kresse and D. Joubert, From ultrasoft pseudopotentials to the projector augmented-wave method, *Physical Review B*, 1999, **59**, 1758-1775.
2. G. Kresse and J. Furthmüller, Efficiency of ab-initio total energy calculations for metals and semiconductors using a plane-wave basis set, *Computational Materials Science*, 1996, **6**, 15-50.
3. P. E. Blöchl, Projector augmented-wave method, *Physical Review B*, 1994, **50**, 17953-17979.
4. J. P. Perdew, K. Burke and M. Ernzerhof, Generalized Gradient Approximation Made Simple, *Physical Review Letters*, 1996, **77**, 3865-3868.
5. A. Majid, M. Azmat, U. A. Rana, S. U.-D. Khan and E. Alzahrani, A computational study of magnetic exchange interactions of 3d and 4f electrons in Ti-Ce co-doped AlN, *Materials Chemistry and Physics*, 2016, **179**, 316-321.
6. V. Wang, N. Xu, J.-C. Liu, G. Tang and W.-T. Geng, VASPKIT: A user-friendly interface facilitating high-throughput computing and analysis using VASP code, *Computer Physics Communications*, 2021, **267**, 108033.
7. K. Momma and F. Izumi, VESTA: a three-dimensional visualization system for electronic and structural analysis, *Journal of Applied Crystallography*, 2008, **41**, 653-658.
8. Z. J. Wang, S. Ghasimi, K. Landfester and K. A. I. Zhang, Molecular Structural Design of Conjugated Microporous Poly(Benzooxadiazole) Networks for Enhanced Photocatalytic Activity with Visible Light, *Advanced Materials*, 2015, **27**, 6265-6270.
9. J. Jiang, Z. Liang, X. Xiong, X. Zhou and H. Ji, A Carbazolyl Porphyrin-Based Conjugated Microporous Polymer for Metal-Free Photocatalytic Aerobic Oxidation Reactions, *ChemCatChem*, 2020, **12**, 3523-3529.
10. H. Wang, D. Yong, S. Chen, S. Jiang, X. Zhang, W. Shao, Q. Zhang, W. Yan, B. Pan and Y. Xie, Oxygen-Vacancy-Mediated Exciton Dissociation in BiOBr for Boosting Charge-Carrier-Involved Molecular Oxygen Activation, *Journal of the American Chemical Society*, 2018, **140**, 1760-1766.
11. D. Sun, L. Ye and Z. Li, Visible-light-assisted aerobic photocatalytic oxidation of amines to imines over NH<sub>2</sub>-MIL-125(Ti), *Applied Catalysis B: Environmental*, 2015, **164**, 428-432.
12. V. R. Battula, H. Singh, S. Kumar, I. Bala, S. K. Pal and K. Kailasam, Natural Sunlight Driven Oxidative Homocoupling of Amines by a Truxene-Based Conjugated Microporous Polymer, *ACS Catalysis*, 2018, **8**, 6751-6759.
13. H. Gao, Y. Chen, H. Li, F. Zhang and G. Tian, Hierarchical Cu<sub>7</sub>S<sub>4</sub>-Cu<sub>9</sub>S<sub>8</sub> heterostructure hollow cubes for photothermal aerobic oxidation of amines,

- Chemical Engineering Journal*, 2019, **363**, 247-258.
14. X.-X. Guo, J. Jiang, Q. Han, X.-H. Liu, X.-T. Zhou and H.-B. Ji, Zinc porphyrin-based electron donor–acceptor-conjugated microporous polymer for the efficient photocatalytic oxidative coupling of amines under visible light, *Applied Catalysis A: General*, 2020, **590**, 117352.
  15. F. Raza, J. H. Park, H.-R. Lee, H.-I. Kim, S.-J. Jeon and J.-H. Kim, Visible-Light-Driven Oxidative Coupling Reactions of Amines by Photoactive WS<sub>2</sub> Nanosheets, *ACS Catalysis*, 2016, **6**, 2754-2759.
  16. A. Kumar, A. Hamdi, Y. Coffinier, A. Addad, P. Roussel, R. Boukherroub and S. L. Jain, Visible light assisted oxidative coupling of benzylamines using heterostructured nanocomposite photocatalyst, *Journal of Photochemistry and Photobiology A: Chemistry*, 2018, **356**, 457-463.
  17. A. Han, J. Sun, H. Zhang, G.-K. Chuah and S. Jaenicke, Visible Light Induced Selective Aerobic Formation of N-benzylidene Benzylamine over 2-aminoterephthalic Acid Sensitized {110}-Facetted BiOCl Nanosheets, *ChemCatChem*, 2019, **11**, 6425-6430.
  18. C. Liu, Y. Liu, Y. Shi, Z. Wang, W. Guo, J. Bi and L. Wu, Au nanoparticles-anchored defective metal–organic frameworks for photocatalytic transformation of amines to imines under visible light, *Journal of Colloid and Interface Science*, 2023, **631**, 154-163.
